# Supplementary material for: Multiple comparative metagenomics using multiset k -mer counting
Source: PeerJ journal article supplement (doi:10.7717/peerj-cs.94), 2016-11-14
Supplement: Supplemental_Figure_S4_simka-correlation-kmersize.pdf [file Supplemental_Figure_S4_simka-correlation-kmersize.pdf]

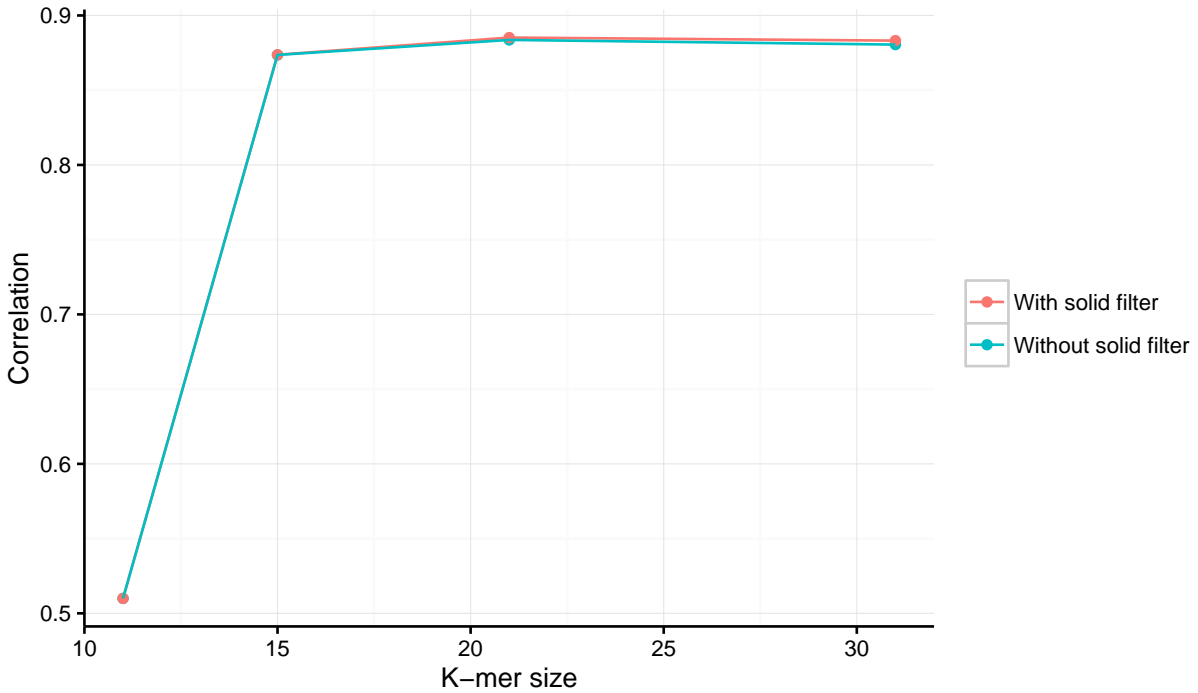

**Supplementary Figure 4. Impact of  $k$ -mer size and of the solid filter, as measured by the correlation with a taxonomic distance.** The impact of two important parameters of Simka was measured on the 138 gut samples from the HMP project: the size of the  $k$ -mers  $k$  and the solid filter. Remember that the solid filter discards  $k$ -mers seen exactly once in a sample. The correlation is pretty robust to the choice of  $k$  as long as  $k$  is larger than 15, with an optimum correlation for  $k = 21$ . Remarkably, the solid filter has almost no impact on the correlation. As shown in Table 2 of the main manuscript, even if the solid filter discards 85% of the distinct  $k$ -mers, solid  $k$ -mers still represent more than 95% of the total base pairs in the HMP dataset, which explains the lack of difference.
