# Supplementary material for: Multiple comparative metagenomics using multiset k -mer counting
Source: PeerJ journal article supplement (doi:10.7717/peerj-cs.94), 2016-11-14
Supplement: Supplemental_Figure_S5_simka-pcoa-hmp.pdf [file Supplemental_Figure_S5_simka-pcoa-hmp.pdf]

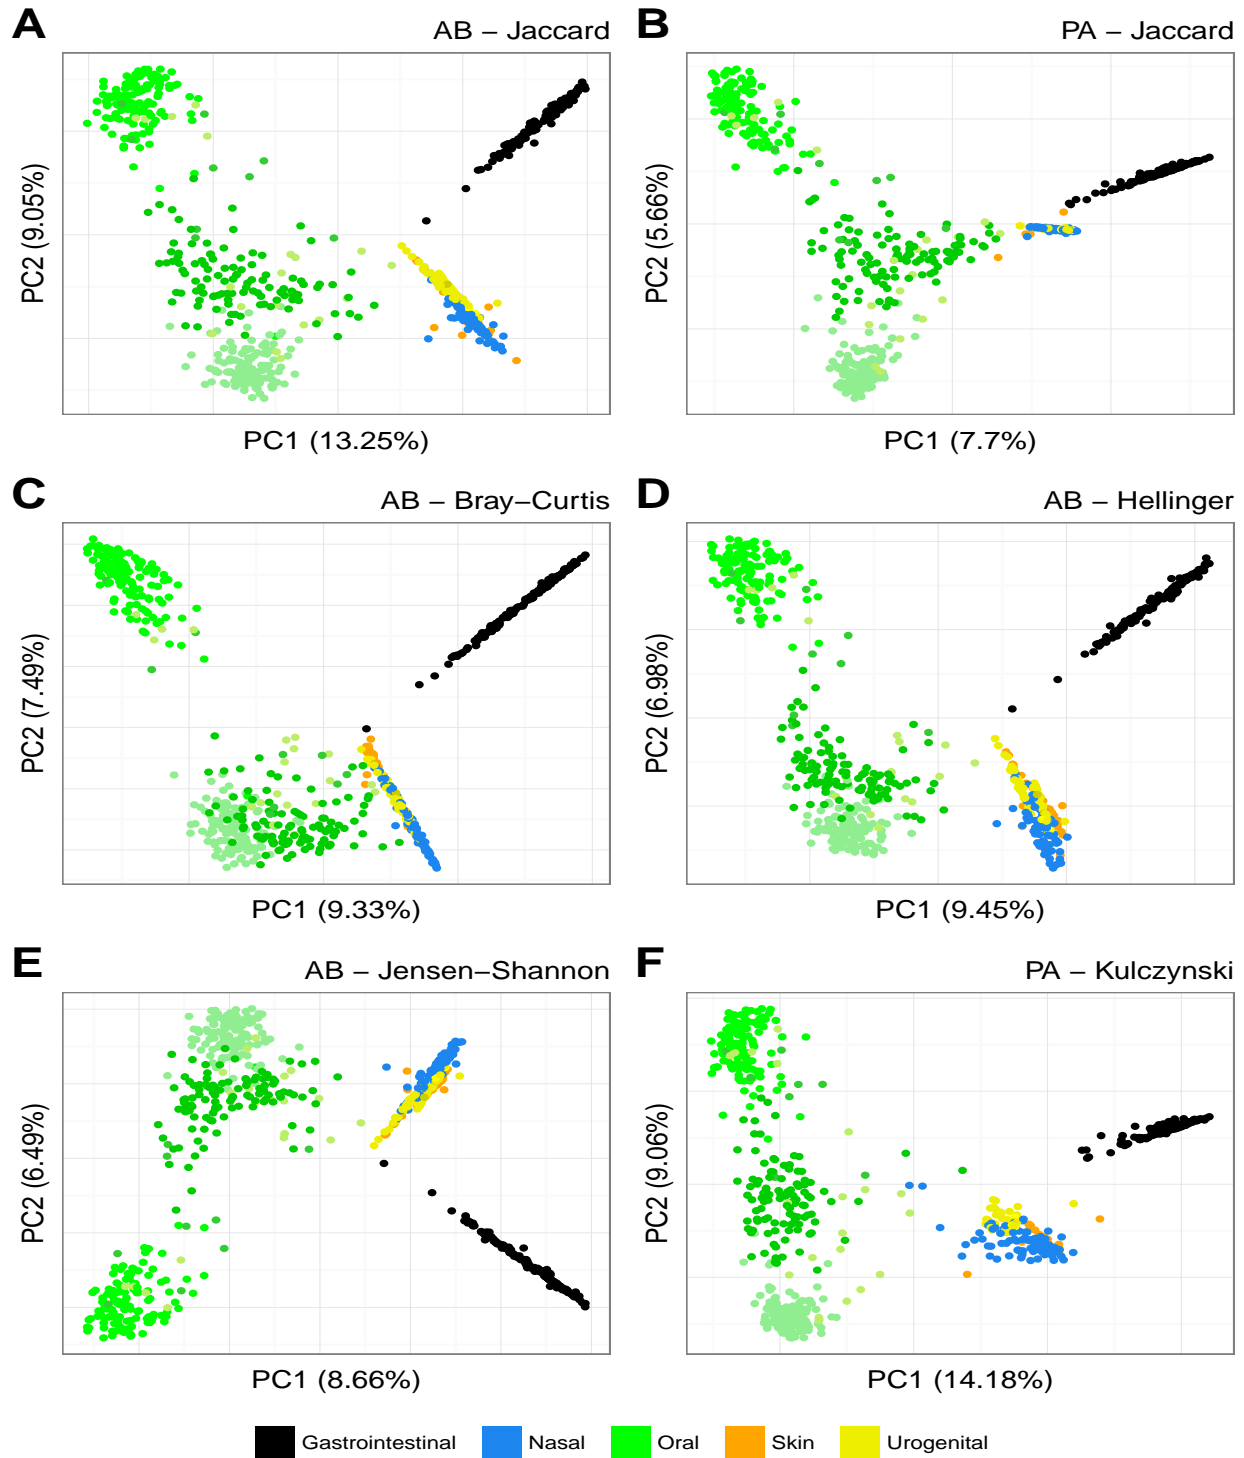

**Supplementary Figure 5. Distribution of the diversity of all HMP samples for several distances computed by Simka.** Each plot corresponds to a Principal Coordinate Analysis (PCoA) of the samples obtained with a given distance computed by Simka with  $k = 21$ . AB stands for quantitative distance. PA stands for qualitative distance. Each dot corresponds to a sample and is coloured according to the human body site it was extracted from. The green color shades correspond to different subparts of the Oral samples.
